# Supplementary material for: Influenza A(H3N2) Virus in Swine at Agricultural Fairs and Transmission to Humans, Michigan and Ohio, USA, 2016
Source: PubMed Central journal article supplement (PMC5572863; doi:10.3201/eid2309.170847), 2017-09
Supplement: 17-0847-Techapp-s1.pdf [file 17-0847-Techapp-s1.pdf]

# Influenza A(H3N2) Virus in Swine at Agricultural Fairs and Transmission to Humans, Michigan and Ohio, USA, 2016

## Technical Appendix

**Table.** Influenza A virus segment sequence identifier (GenBank or GISAID EpiFlu accession no.)\*

| Strain Name                            | PB2       | PB1       | PA        | HA        | NP        | NA        | M         | NS        |
|----------------------------------------|-----------|-----------|-----------|-----------|-----------|-----------|-----------|-----------|
| A/Ohio/27/2016(H3N2)                   | EPI824746 | EPI824747 | EPI824745 | EPI824749 | EPI824742 | EPI824748 | EPI824744 | EPI824743 |
| A/Ohio/28/2016(H3N2)                   | EPI824754 | EPI824755 |           | EPI824757 |           | EPI824756 | EPI824752 | EPI824751 |
| A/Ohio/29/2016(H3N2)                   | EPI881705 | EPI881706 | EPI881704 | EPI838255 | EPI881701 | EPI838254 | EPI881703 | EPI881702 |
| A/Ohio/32/2016(H3N2)                   | EPI881724 | EPI881725 | EPI881723 | EPI838288 | EPI881720 | EPI838287 | EPI881722 | EPI881721 |
| A/Ohio/33/2016(H3N2)                   |           |           |           | EPI838268 |           |           |           |           |
| A/Ohio/35/2016(H3N2)                   | EPI881730 | EPI881731 | EPI881729 | EPI838290 | EPI881726 | EPI838289 | EPI881728 | EPI881727 |
| A/Michigan/82/2016(H3N2)               | EPI824762 | EPI824763 | EPI824761 | EPI824765 | EPI824758 | EPI824764 | EPI824760 | EPI824759 |
| A/Michigan/83/2016(H3N2)               | EPI824772 | EPI824773 | EPI824771 | EPI824775 | EPI824768 | EPI824774 | EPI824770 | EPI824769 |
| A/Michigan/84/2016(H3N2)               | EPI838248 | EPI838249 | EPI838247 | EPI824767 | EPI838244 | EPI824766 | EPI838246 | EPI838245 |
| A/Michigan/87/2016(H3N2)               | EPI881759 | EPI881760 | EPI881758 | EPI838251 | EPI881755 | EPI838250 | EPI881757 | EPI881756 |
| A/Michigan/88/2016(H3N2)               | EPI881700 |           | EPI881699 | EPI838253 | EPI881697 | EPI838252 | EPI881698 |           |
| A/Michigan/89/2016(H3N2)               | EPI881710 | EPI881711 | EPI881709 | EPI838266 | EPI881707 | EPI838265 | EPI881708 |           |
| A/Michigan/90/2016(H3N2)               | EPI838261 | EPI838262 | EPI838260 | EPI838264 | EPI838257 | EPI838263 | EPI838259 | EPI838258 |
| A/Michigan/91/2016(H3N2)               |           |           |           | EPI838256 |           |           |           |           |
| A/Michigan/93/2016(H3N2)               | EPI838272 | EPI838273 | EPI838271 | EPI838275 | EPI838269 | EPI838274 | EPI838270 | EPI881712 |
| A/Michigan/94/2016(H3N2)               | EPI838279 | EPI838280 |           | EPI838282 | EPI838276 | EPI838281 | EPI838277 |           |
| A/Michigan/95/2016(H3N2)               |           |           |           | EPI838284 |           | EPI838283 |           |           |
| A/Michigan/96/2016(H3N2)               | EPI881718 | EPI881719 | EPI881717 | EPI838286 | EPI881714 | EPI838285 | EPI881716 | EPI881715 |
| A/swine/Ohio/16TOSU4783/2016(H3N2)     | KX981537  | KX981559  | KX981486  | KX981534  | KX981517  | KX981555  | KX981506  | KX981516  |
| A/swine/Ohio/16TOSU4788/2016(H3N2)     | KX981507  | KX981564  | KX981538  | KX981496  | KX981550  | KX981514  | KX981489  | KX981549  |
| A/swine/Michigan/16TOSU5083/2016(H3N2) | KY604999  | KY605001  | KY604981  | KY604977  | KY604983  | KY604980  | KY604991  | KY604982  |
| A/swine/Michigan/16TOSU5089/2016(H3N2) | KY604996  | KY604987  | KY604978  | KY605007  | KY604994  | KY604990  | KY604989  | KY605006  |
| A/swine/Michigan/16TOSU5222/2016(H3N2) | KY605004  | KY604998  | KY604988  | KY604993  | KY604997  | KY604985  | KY604986  | KY605000  |
| A/swine/Michigan/16TOSU5238/2016(H3N2) | KY604995  | KY605003  | KY604976  | KY605005  | KY604979  | KY604984  | KY604992  | KY605002  |
| A/swine/Ohio/16TOSU5245/2016(H3N2)     | KX981522  | KX981522  | KX981522  | KX981522  | KX981522  | KX981522  | KX981522  | KX981522  |
| A/swine/Ohio/16TOSU5254/2016(H3N2)     | KX981528  | KX981562  | KX981551  | KX981518  | KX981502  | KX981536  | KX981491  | KX981545  |
| A/swine/Ohio/16TOSU5873/2016(H3N2)     | KX981527  | KX981560  | KX981487  | KX981526  | KX981510  | KX981509  | KX981548  | KX981480  |
| A/swine/Ohio/16TOSU5879/2016(H3N2)     | KX981500  | KX981563  | KX981505  | KX981554  | KX981515  | KX981513  | KX981542  | KX981520  |
| A/swine/Ohio/16TOSU8757/2016(H3N2)     | KX98148   | KX981561  | KX981481  | KX981523  | KX981492  | KX981503  | KX981493  | KX981495  |
| A/swine/Ohio/16TOSU8764/2016(H3N2)     | KX981501  | KX981566  | KX981519  | KX981552  | KX981494  | KX981553  | KX981530  | KX981490  |
| A/swine/Michigan/A01104095/2016(H3N2)  | KX772282  | KX772283  | KX772284  | KX772285  | KX772286  | KX772287  | KX772288  | KX772289  |

\*GISAID, <http://platform.gisaid.org>.
